# Supplementary material for: The effect of bound rubber on vulcanization kinetics in silica filled silicone rubber
Source: Royal Society of Chemistry journal article supplement (doi:10.1039/c6ra20063j), 2016-01-01
Supplement: c6ra20063j1.pdf [file c6ra20063j1.pdf]

*Supporting Information*

**The effect of bound rubber on vulcanization kinetics in silica filled silicone  
rubber**

Lixian Song <sup>a,c</sup>, Zhanhong Li<sup>c</sup>, Liang Chen<sup>a</sup>, Hanmei Zhou<sup>c</sup>, Ai Lu<sup>\*b</sup>, Liangbin Li<sup>\*a</sup>

*a CAS Key Laboratory of Soft Matter Chemistry, Department of Polymer Science and Engineering,*

*National Synchrotron Radiation Lab, University of Science and Technology of China, Hefei, China*

*b Institute of Chemical Materials, China Academy of Engineering Physics, Mianyang 621900, Sichuan,*

*China*

*c State Key Laboratory Cultivation Base for Nonmetal Composites and Functional Materials,*

*Southwest University of Science and Technology, Mianyang 621010, Sichuan, China*

Table 1 Kinetic parameters for compounds, obtained by fitting the vulcanization  
experimental data with Equation (4)

| Compound | k (T)<br>min <sup>-1</sup> | m    | n    | r <sup>2</sup> |
|----------|----------------------------|------|------|----------------|
| VMQ      | 4.93                       | 0.52 | 1.42 | 0.99           |
| SG10     | 5.38                       | 0.56 | 1.46 | 0.99           |
| SG20     | 5.58                       | 0.58 | 1.46 | 0.98           |
| SG30     | 5.44                       | 0.56 | 1.42 | 0.98           |
| SG40     | 4.83                       | 0.54 | 1.38 | 0.98           |
| SG50     | 5.56                       | 0.55 | 1.43 | 0.98           |
| SG60     | 4.59                       | 0.47 | 1.33 | 0.99           |
| SG70     | 5.18                       | 0.53 | 1.39 | 0.98           |
| SA10     | 5.72                       | 0.61 | 1.57 | 0.99           |
| SA20     | 5.24                       | 0.58 | 1.51 | 0.99           |
| SA30     | 4.91                       | 0.57 | 1.53 | 0.99           |

---

|      |      |      |      |      |
|------|------|------|------|------|
| SA40 | 4.79 | 0.58 | 1.70 | 0.99 |
| SA50 | 4.40 | 0.55 | 1.62 | 0.99 |
| SA60 | 3.26 | 0.50 | 1.49 | 0.99 |
| SA70 | 3.76 | 0.53 | 1.62 | 0.99 |
| SZ10 | 5.18 | 0.60 | 1.47 | 0.99 |
| SZ20 | 5.46 | 0.59 | 1.51 | 0.99 |
| SZ30 | 5.30 | 0.55 | 1.54 | 0.99 |
| SZ40 | 5.05 | 0.58 | 1.53 | 0.99 |
| SZ50 | 4.74 | 0.55 | 1.51 | 0.99 |
| SZ60 | 4.53 | 0.52 | 1.51 | 0.99 |
| SZ70 | 4.21 | 0.54 | 1.42 | 0.99 |

---
